# Supplementary material for: Progression to Severe Hypernatremia in Hospitalized General Medicine Inpatients: An Observational Study of Hospital-Acquired Hypernatremia
Source: PubMed Central journal article supplement (PMC7404557; doi:10.3390/medicina56070358), 2020-07-17
Supplement: medicina-56-00358-s001.pdf [file medicina-56-00358-s001.pdf]

**Table S1:** Univariable logistic regression on progression to severe hyponatremia

| Factor/variable                                          | Odds ratio | 95% CIs   | P value |
|----------------------------------------------------------|------------|-----------|---------|
| Age, per 5 years                                         | 1.30       | 1.00-1.69 | 0.053   |
| Male sex                                                 | 1.22       | 0.43-3.45 | 0.71    |
| Residential care                                         | 1.27       | 0.44-3.62 | 0.66    |
| Dementia                                                 | 0.57       | 0.12-2.61 | 0.47    |
| Disability                                               | 1.07       | 0.13-8.99 | 0.95    |
| Diabetes mellitus                                        | 1.24       | 0.41-3.73 | 0.70    |
| CKD stage as continuous variable                         | 2.52       | 1.38-4.60 | 0.003   |
| Stage 4/5 CKD                                            | 4.91       | 1.73-13.9 | 0.003   |
| Vomiting/diarrhoea                                       | 0.81       | 0.17-3.79 | 0.79    |
| Thickened fluids                                         | 1.05       | 0.32-3.41 | 0.94    |
| Fasting duration, days                                   | 1.01       | 1.00-1.03 | 0.11    |
| Sepsis                                                   | 1.21       | 0.44-3.30 | 0.71    |
| Overall diuretic use                                     | 0.95       | 0.34-2.62 | 0.92    |
| Intravenous diuretic use                                 | 1.68       | 0.61-4.62 | 0.32    |
| Admission Cr, per 10 $\mu\text{mol/L}$                   | 1.03       | 0.99-1.06 | 0.14    |
| Intensive care encounter                                 | 0.64       | 0.23-1.81 | 0.40    |
| Onset Cr, per 10 $\mu\text{mol/L}$                       | 1.02       | 0.98-1.06 | 0.39    |
| Peak Cr, per 10 $\mu\text{mol/L}$                        | 1.03       | 0.99-1.07 | 0.11    |
| Pre-onset change in Cr, per 10 $\mu\text{mol/L}$         | 0.98       | 0.93-1.03 | 0.35    |
| Pre-onset no IV fluids                                   | 1.01       | 0.21-4.77 | 0.99    |
| Pre-onset total IV fluid volume, Litres                  | 1.04       | 0.93-1.16 | 0.52    |
| Pre-onset <i>free water</i> <sup>1</sup> volume, Litres  | 1.20       | 0.83-1.76 | 0.34    |
| Post-onset no IV fluids                                  | 1.03       | 0.28-3.84 | 0.96    |
| Post-onset total IV fluid volume, Litres                 | 1.12       | 0.97-1.29 | 0.14    |
| Post-onset <i>free water</i> <sup>1</sup> volume, Litres | 1.37       | 1.10-1.72 | 0.006   |
| Post-onset change in Cr, per 10 $\mu\text{mol/L}$        | 1.30       | 1.10-1.53 | 0.002   |

<sup>1</sup> For estimation purposes, includes 5% glucose and 4% glucose/0.18% NaCl solutions.

Abbreviations: Cr, Creatinine; CKD, Chronic kidney disease.
